# Supplementary material for: Racial Difference in the Association of Long-Term Exposure to Fine Particulate Matter (PM2.5) and Cardiovascular Disease Mortality among Renal Transplant Recipients
Source: MDPI journal article supplement (doi:10.3390/ijerph18084297), 2021-04-18
Supplement: s1 [file s1]

**Table S1: Multivariable adjusted hazard ratios for fatal events per 10 µg/m<sup>3</sup> increment of PM<sub>2.5</sub> by Race with and without Adjusting for Socioeconomic**

| Outcome (Mortality)                                                                                | Race               |           |                   |           |
|----------------------------------------------------------------------------------------------------|--------------------|-----------|-------------------|-----------|
|                                                                                                    | Black              | %         | Non-Black         | % Change  |
|                                                                                                    | HR (95%CI) *       | Change    | HR (95%CI) *      |           |
| <b><i>All-cause Mortality<sup>y</sup></i></b>                                                      |                    |           |                   |           |
| Single Pollutant Full Model*                                                                       | 2.69 (2.28, 3.18)  | Reference | 2.27 (2.07, 2.48) | Reference |
| Single Pollutant Full Model + Proportion of Persons Below Poverty Estimate                         | 2.61 (2.21, 3.09)  | -2.97     | 2.24 (2.05, 2.46) | -1.32     |
| Single Pollutant Full Model + Proportion of Civilian (Age 16+) Unemployed Estimate                 | 2.74 (2.32, 3.24)  | 1.86      | 2.28 (2.08, 2.49) | 0.44      |
| Single Pollutant Full Model + Per Capita Income Estimate, 2006-2010 ACS                            | 2.63 (2.23, 3.10)  | -2.23     | 2.21 (2.01, 2.42) | -2.64     |
| Single Pollutant Full Model + Proportion of persons with no high school diploma (age 25+) Estimate | 2.71 (2.29, 3.20)  | 0.74      | 2.26 (2.06, 2.48) | -0.26     |
| Single Pollutant Full Model + all 4 above SES Factors                                              | 2.78 (2.35, 3.29)  | 3.35      | 2.31 (2.10, 2.53) | 1.76      |
| <b><i>Total CVD Mortality<sup>y</sup></i></b>                                                      |                    |           |                   |           |
| Single Pollutant Full Model*                                                                       | 1.82 (1.33, 2.49)  | Reference | 1.87 (1.55, 2.25) | Reference |
| Single Pollutant Full Model + Proportion of Persons Below Poverty Estimate                         | 1.76 (1.28, 2.42)  | -3.30     | 1.85 (1.53, 2.22) | -1.07     |
| Single Pollutant Full Model + Proportion of Civilian (Age 16+) Unemployed Estimate                 | 1.88 (1.37, 2.58)  | 3.30      | 1.88 (1.56, 2.26) | 0.53      |
| Single Pollutant Full Model + Per Capita Income Estimate, 2006-2010 ACS                            | 1.79 (1.31, 2.46)  | -1.65     | 1.82 (1.51, 2.20) | -2.67     |
| Single Pollutant Full Model + Proportion of persons with no high school diploma (age 25+) estimate | 1.80 (1.31, 2.47)  | -1.10     | 1.84(1.52, 2.22)  | -1.60     |
| Single Pollutant Full Model + all 4 above SES Factors                                              | 1.89 (1.38, 2.60)  | 3.85      | 1.87 (1.55, 2.26) | 0.00      |
| <b><i>CHD Mortality</i></b>                                                                        |                    |           |                   |           |
| Single Pollutant Full Model*                                                                       | 4.60 (2.10, 10.12) | Reference | 1.88 (1.27, 2.79) | Reference |
| Single Pollutant Full Model + Proportion of Persons Below Poverty Estimate                         | 4.61 (2.10, 10.12) | 0.22      | 1.88 (1.27, 2.79) | 0.00      |
| Single Pollutant Full Model + Proportion of Civilian (Age 16+) Unemployed Estimate                 | 4.97 (2.28, 10.83) | 8.04      | 1.92 (1.30, 2.86) | 2.13      |
| Single Pollutant Full Model + Per Capita Income Estimate, 2006-2010 ACS                            | 4.64 (2.12, 10.19) | 0.87      | 1.89 (1.27, 2.79) | 0.53      |
| Single Pollutant Full Model + Proportion of persons with no high school diploma (age 25+) Estimate | 4.80 (2.19, 10.51) | 4.35      | 1.90 (1.28, 2.83) | 1.06      |
| Single Pollutant Full Model + all 4 above SES Factors                                              | 5.01 (2.29, 10.94) | 8.91      | 1.99 (1.34, 2.96) | 5.85      |

\*Adjusted for all the following variables: sex, years after transplant, primary cause of ESRD, length in years from first ESRD services and first transplant, donor type, ESRD Network categories, BMI categories, and immunosuppressive medications. <sup>†</sup>Effect estimates at attained age of 60 yrs. using time-dependent variables. <sup>‡</sup>P-value for interaction term < 0.05.
